# Supplementary material for: B(C6F5)3: a robust catalyst for the activation of CO2 and dimethylamine borane for the N-formylation reactions
Source: Royal Society of Chemistry journal article supplement (doi:10.1039/c8nj02816h), 2018-01-01
Supplement: c8nj02816h1.pdf [file c8nj02816h1.pdf]

# **B(C<sub>6</sub>F<sub>5</sub>)<sub>3</sub>: a Robust Catalyst for the Activation of CO<sub>2</sub> and Dimethylamine Borane for the N-Formylation Reactions**

Vitthal B. Saptal, Gaurav Juneja and Bhalchandra M. Bhanage<sup>\*a</sup>

Department of Chemistry, Institute of Chemical Technology, Mumbai, 400019

## **Table of Contents**

|                                                                      |    |
|----------------------------------------------------------------------|----|
| 1) General.....                                                      | 1  |
| 2) Experimental section.....                                         | 1  |
| 3) H <sup>1</sup> and C <sup>13</sup> NMR of selective products..... | 2  |
| 4) Mass spectra.....                                                 | 8  |
| 5) References.....                                                   | 11 |

## Experimental Section

### 1) General

All chemicals and solvents were purchased from different commercial sources and used as received without further purifications. The progress of the reaction was monitored by GC–MS. A QP2010 GC–MS instrument [Rtx-17 column, 30 m × 25 mm i.d, film thickness (df) = 0.25 μm; column flow 2 mL min<sup>-1</sup>, 100 to 240 °C at a rate of 10 °C min<sup>-1</sup>] was used for the mass spectrometric analysis of the products. The products were purified by column chromatography with 100–200 mesh silica gel. The <sup>1</sup>H NMR spectra were recorded with a 400 MHz spectrometer with samples in CDCl<sub>3</sub>. The <sup>13</sup>C NMR spectra were recorded with a 100 MHz spectrometer with the samples in CDCl<sub>3</sub>.

### 2) Experimental procedure for the formylation and cyclization reactions

The N-formylation and cyclized product were synthesized by the reaction amines with CO<sub>2</sub> and dimethylamine borane (DMAB) in the presence of catalyst. All the reactions were carried out in a 100 mL stainless-steel autoclave with stirring at 650 rpm and equipped with an automatic stirrer and temperature control system. In a typical procedure, the B(C<sub>6</sub>F<sub>5</sub>)<sub>3</sub> (2 mg) was introduced into the reactor containing amine (5 mmol), CH<sub>3</sub>CN (3 mL) and DMAB (10 mmol) at room temperature and then pressurized to the respective pressure of CO<sub>2</sub> and heated to a particular temperature. After completion the reaction, the reactor was cooled in an ice-cold water bath and then CO<sub>2</sub> was released slowly. The synthesized products were extracted and then purified by using the pet ether and ethyl acetate by using column chromatography and then H<sup>1</sup> & C<sup>13</sup> spectra were recorded, for additional spectra refer references.<sup>1-3</sup>

### 3) NMR Spectra

### 3.1 N-cyclohexylformamide (6a)

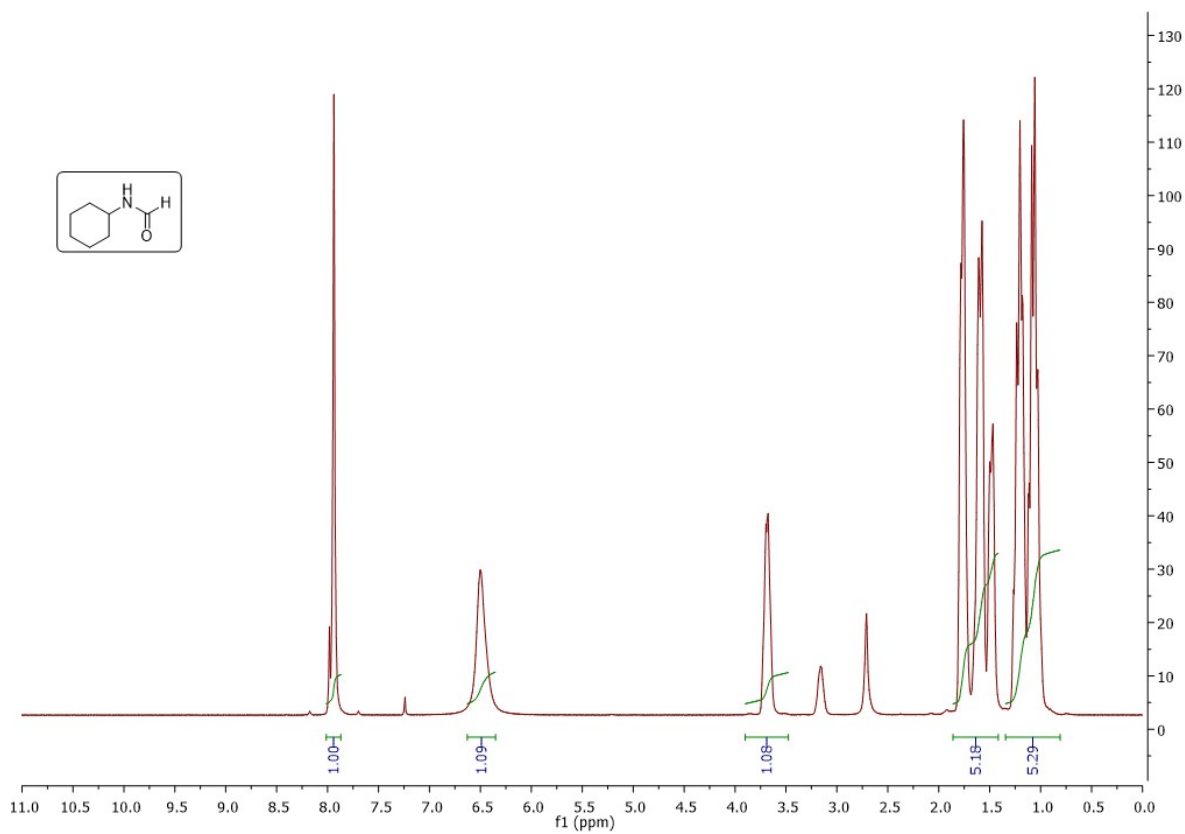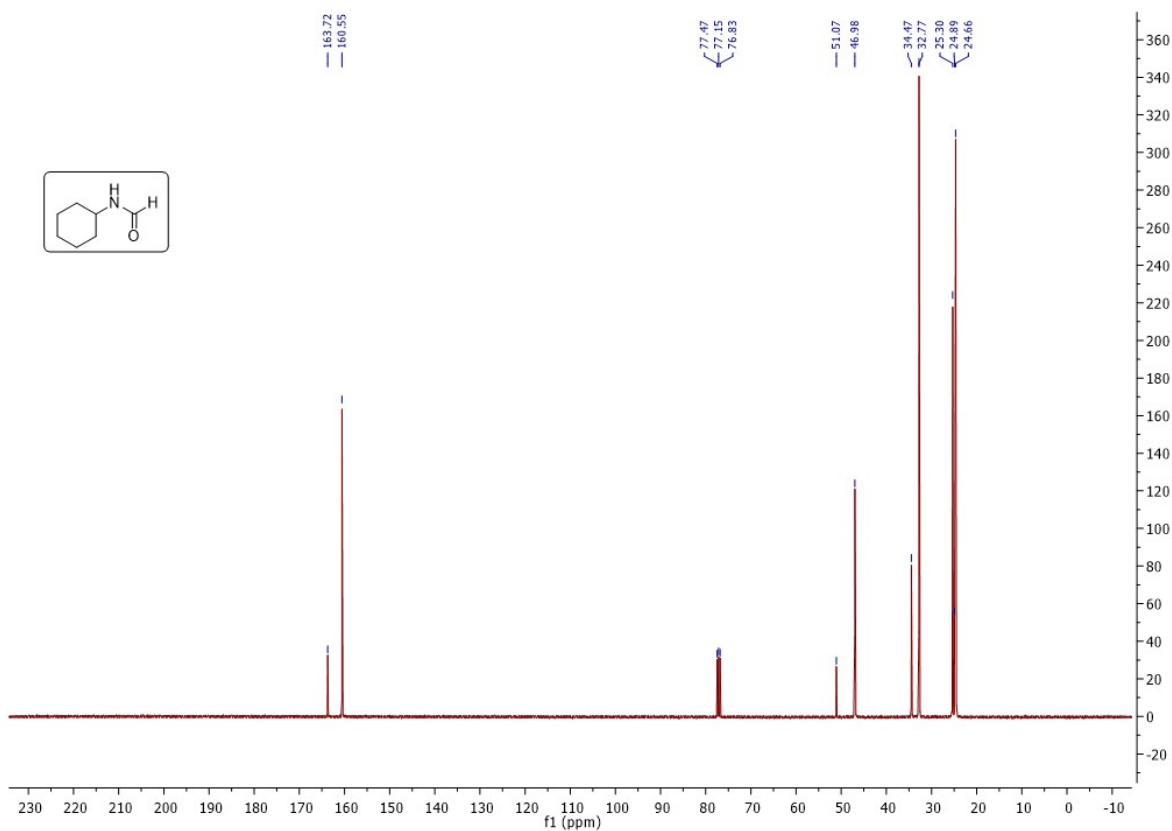

### 3.2 N,N-dibutylformamide (7a)

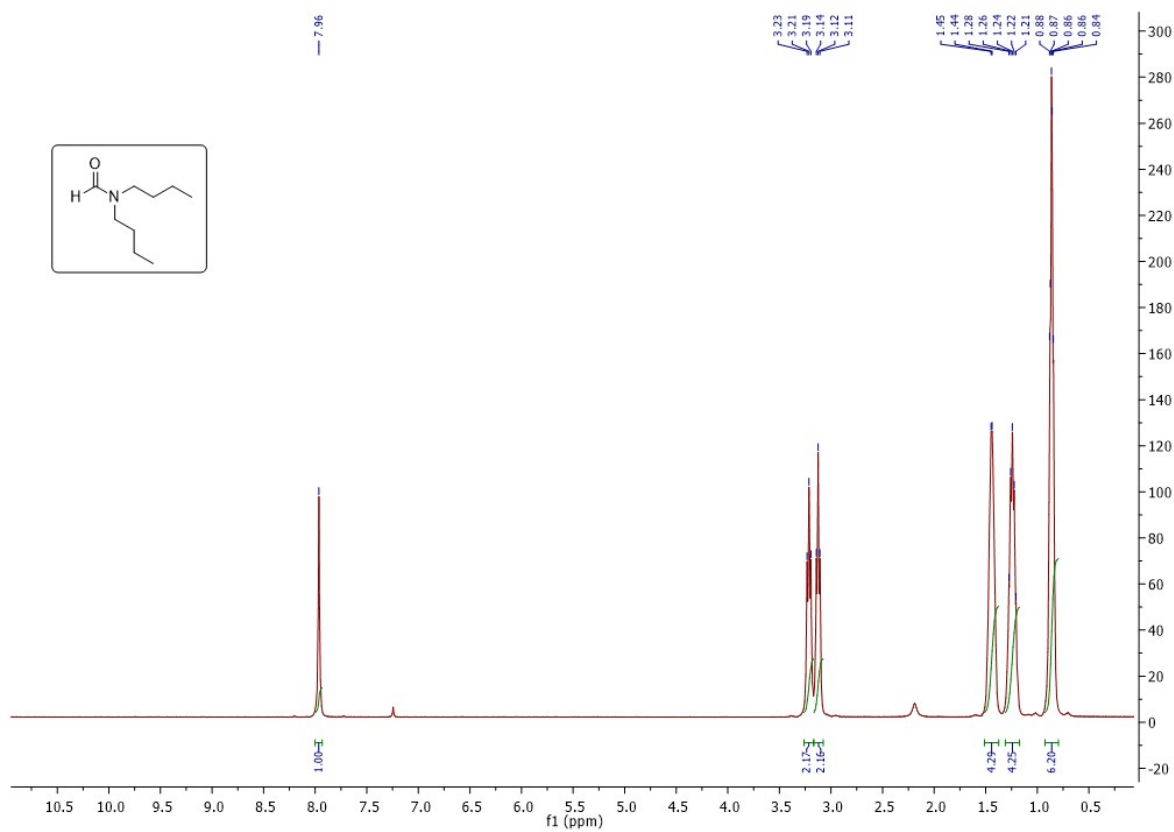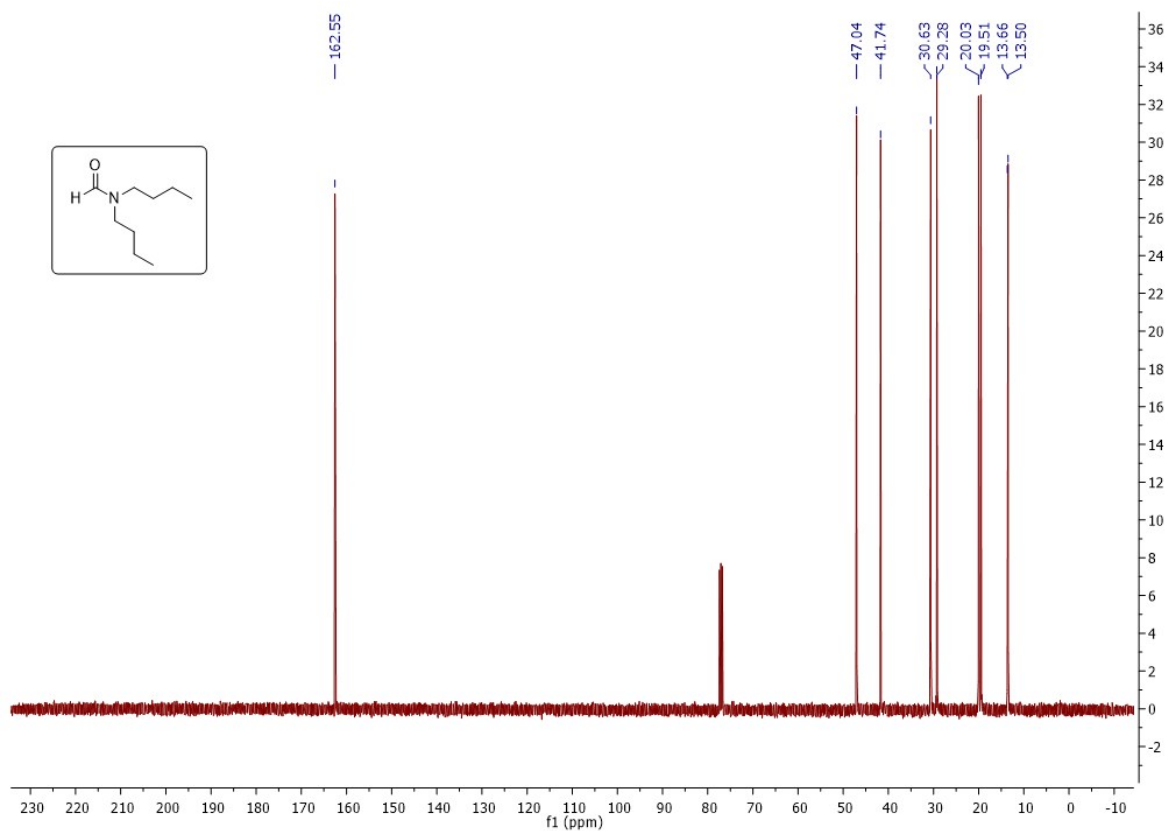

### 3.3 N-methyl-N-phenylformamide (12a)

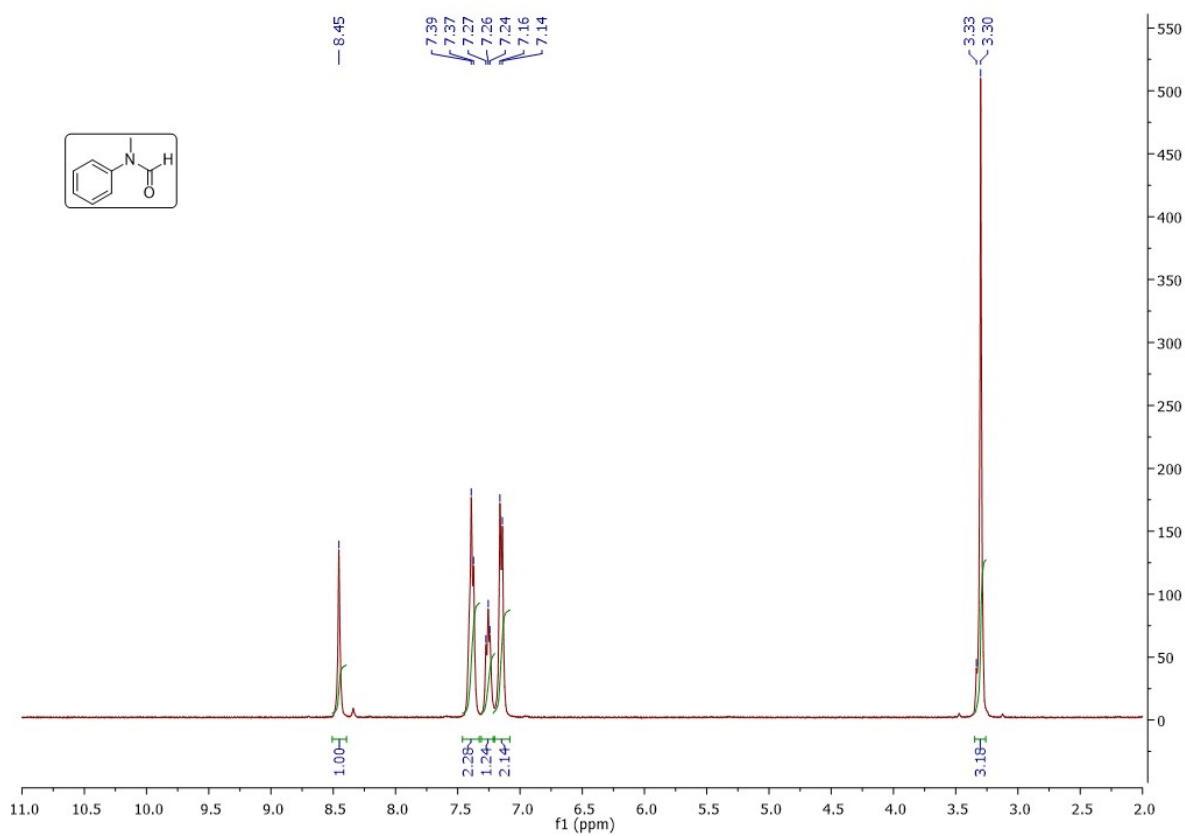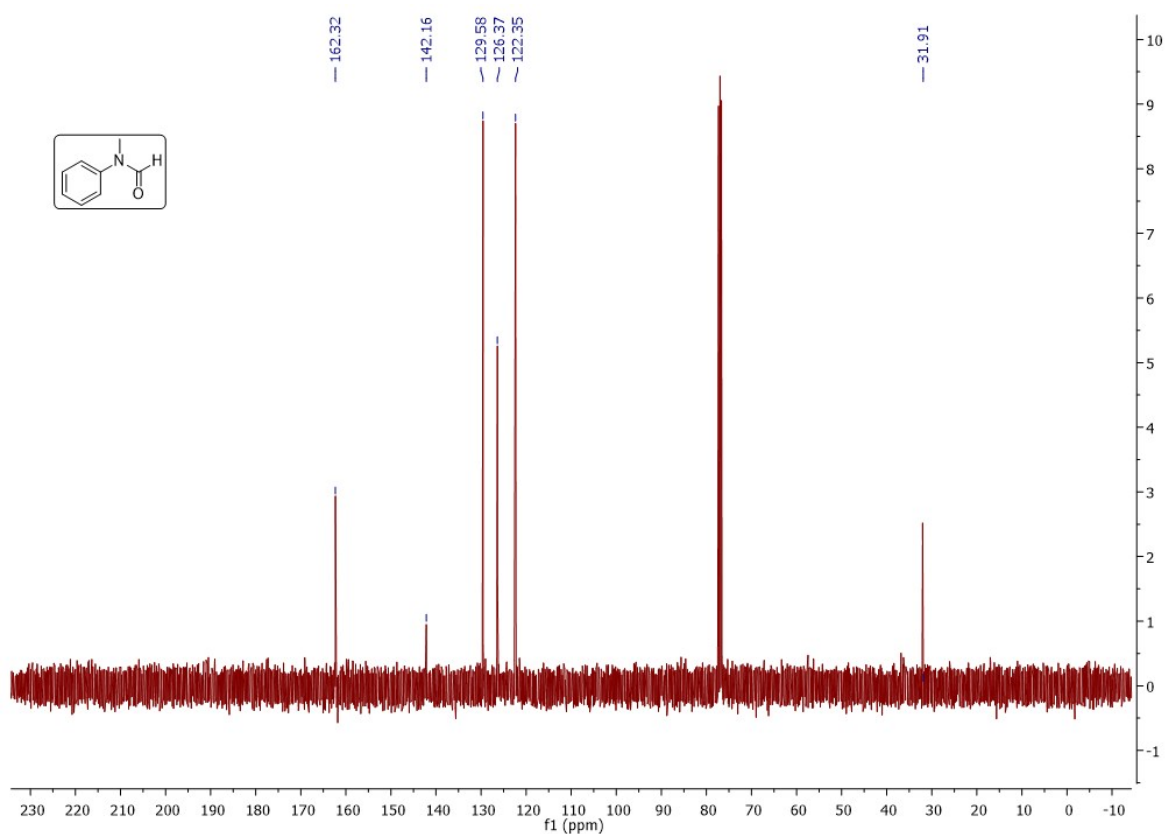

### 3.4 1H-benzo[d]imidazole(3b)

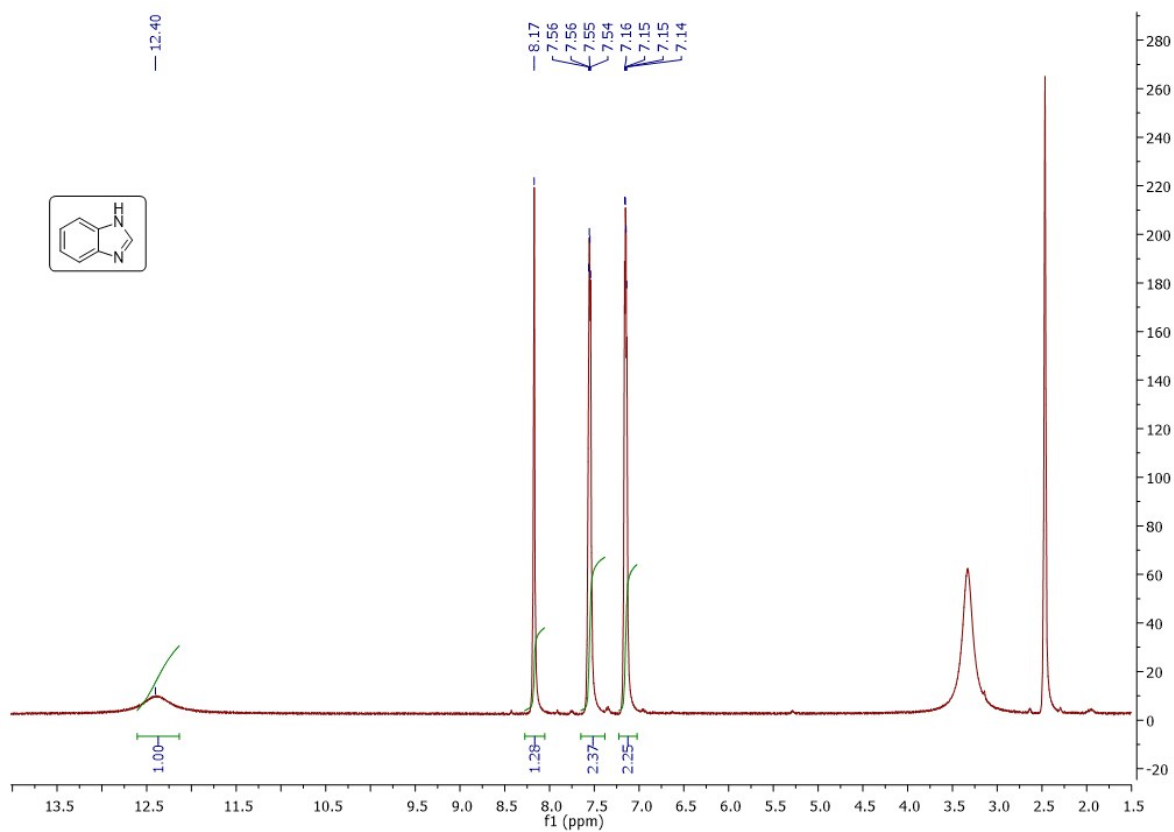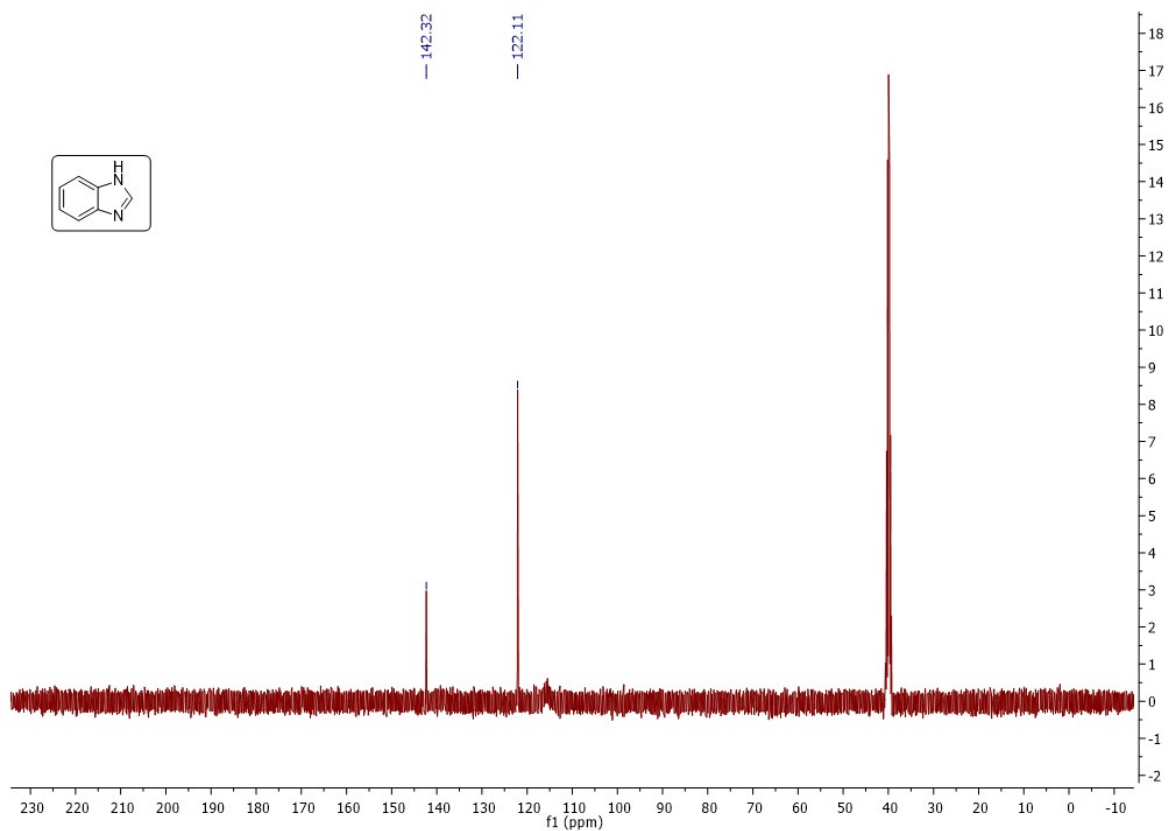

### 3.5 1-methyl-1H-benzo[d]imidazole (4b)

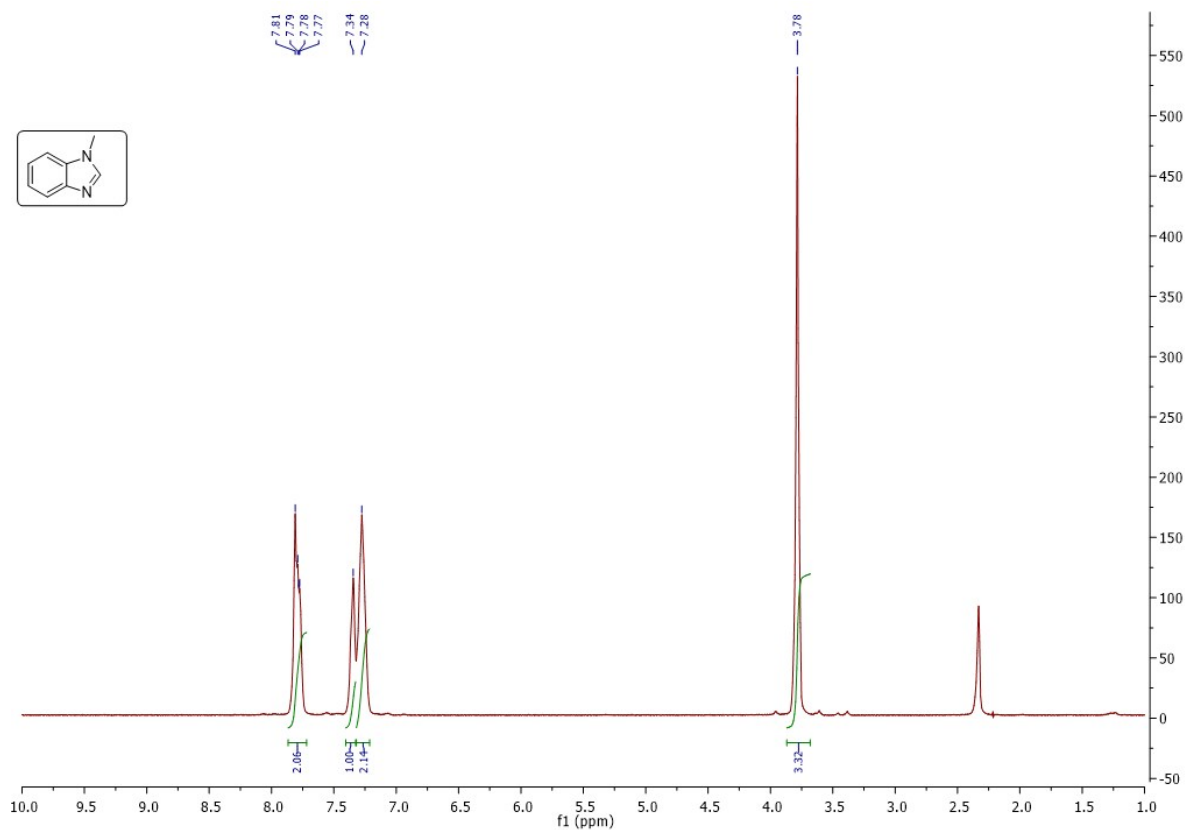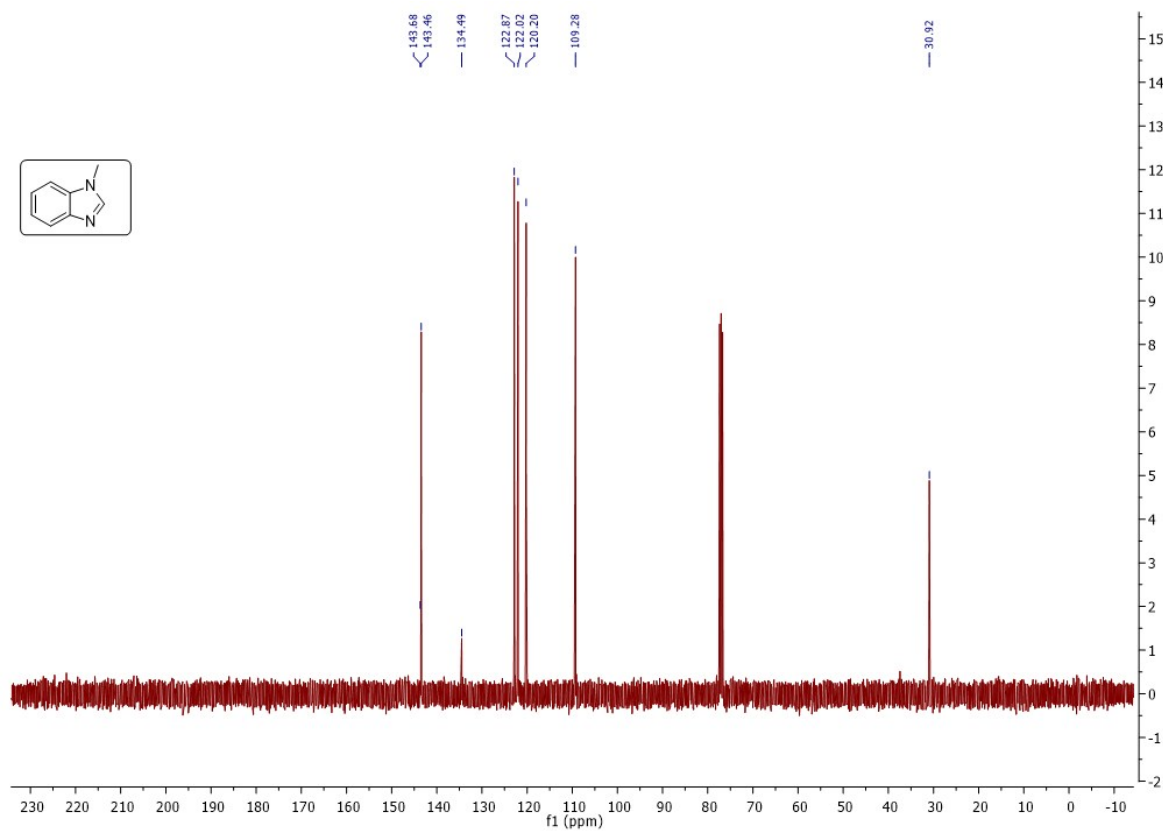

#### 4) Mass spectra

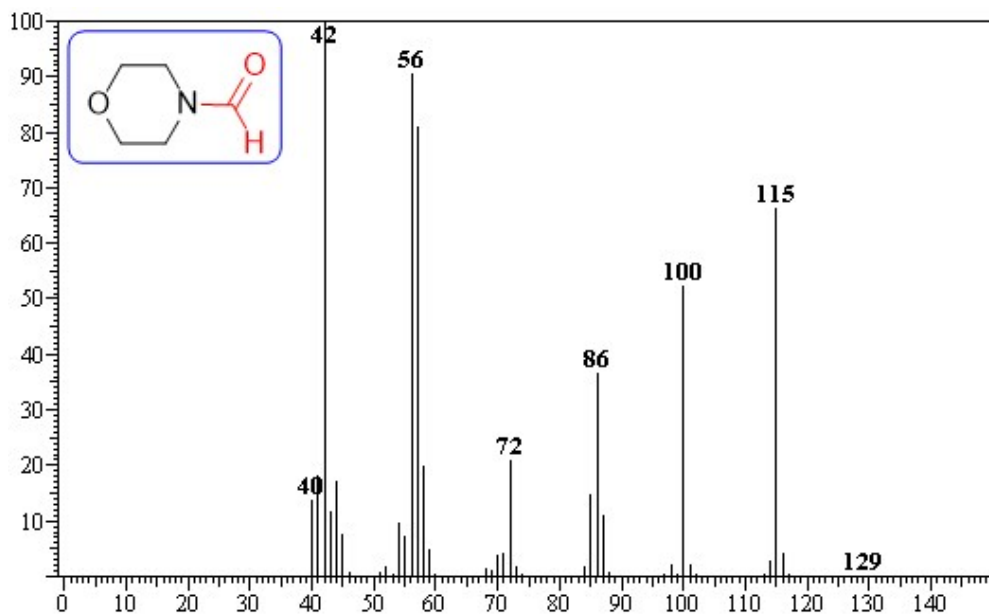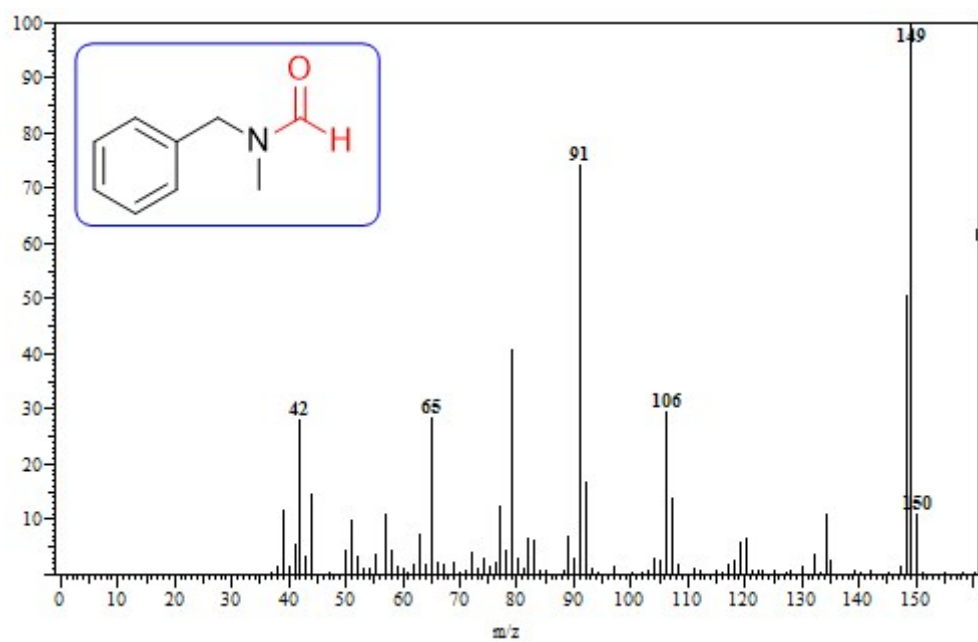



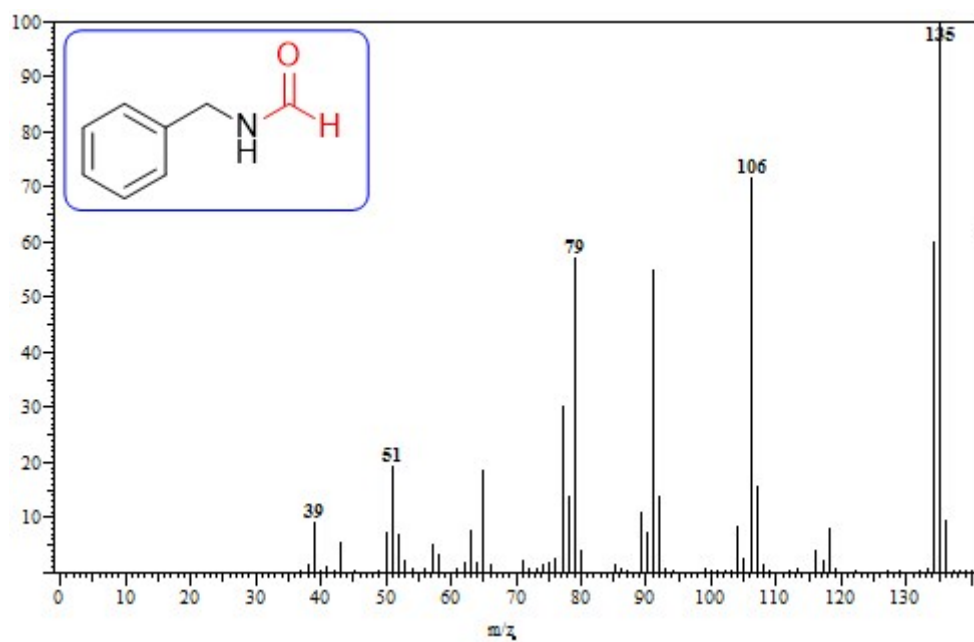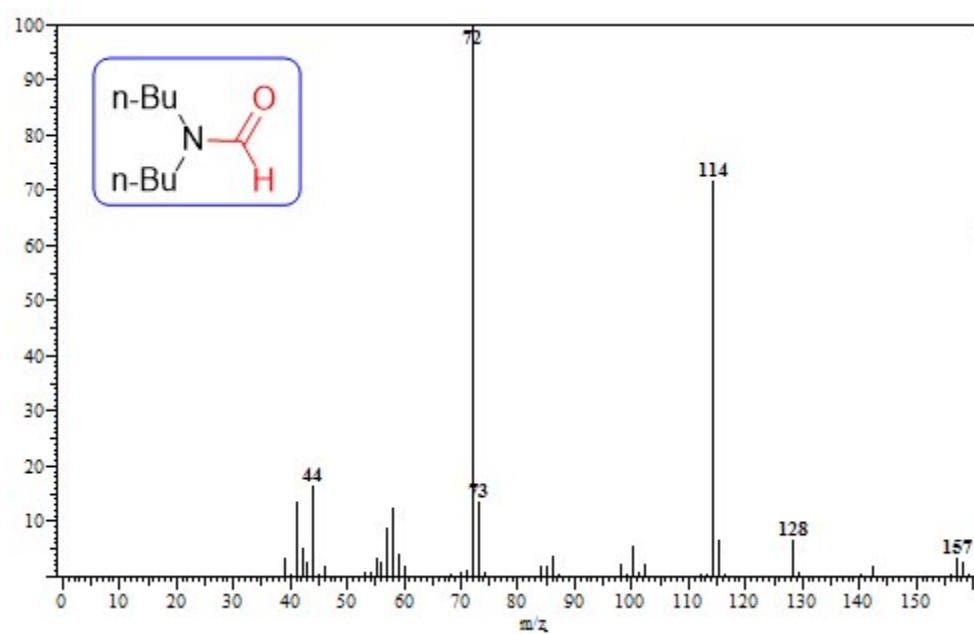

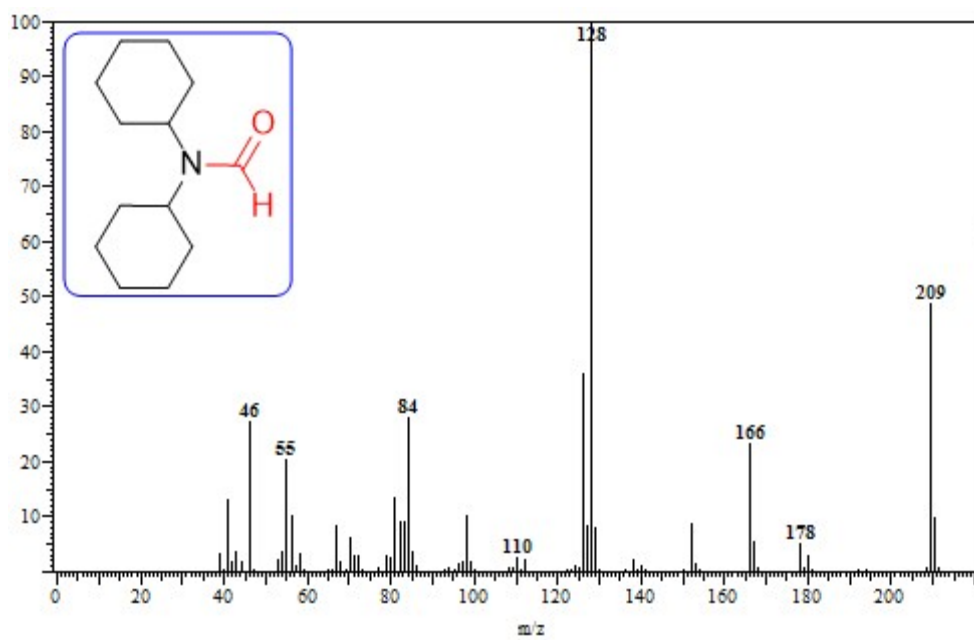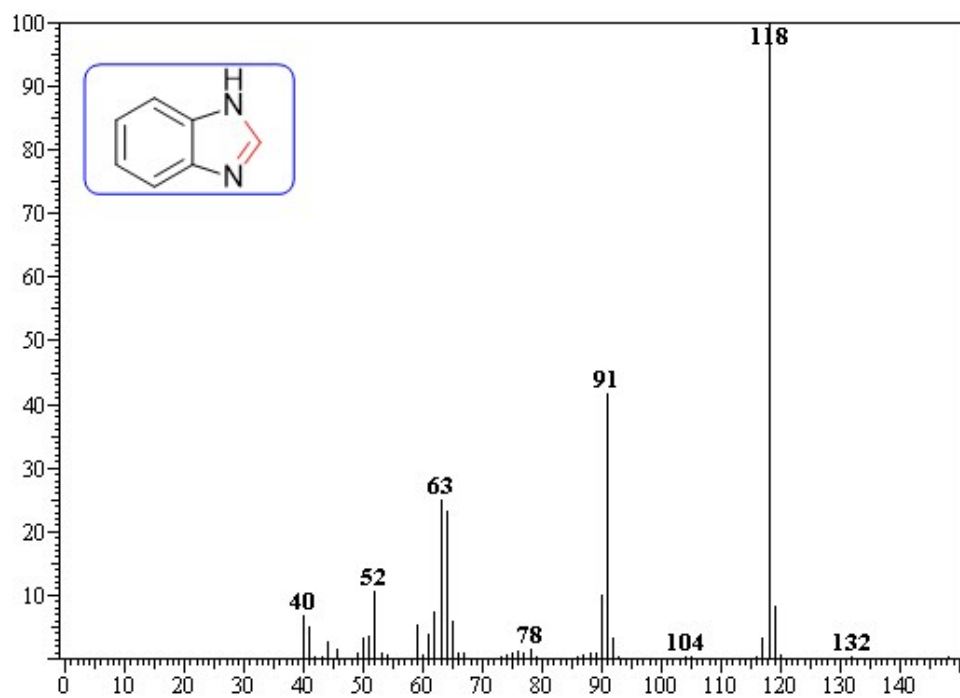

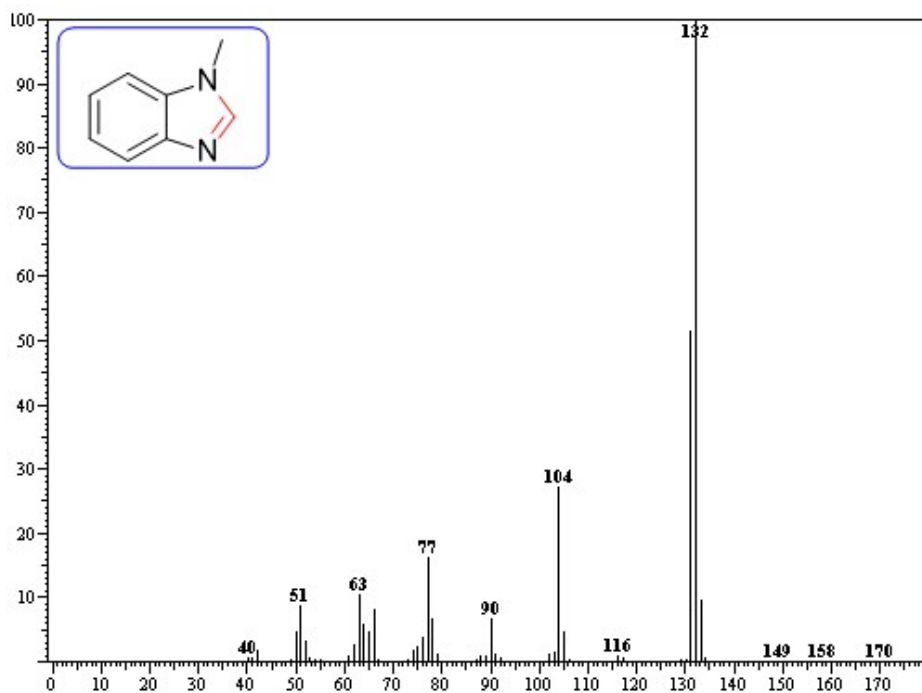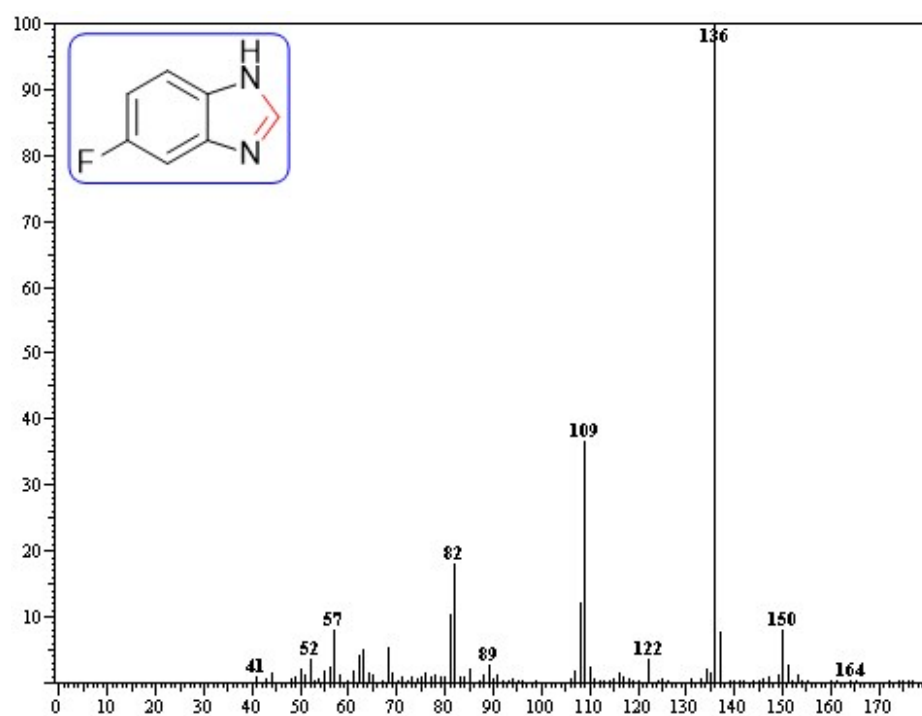

## 5) References

- 1) Vitthal B. Saptal, Bhalchandra M Bhanage, *ChemSusChem*, **2016**, *9*, 1980-1985.
- 2) Vitthal B. Saptal, Takehiko Sasaki, Bhalchandra M. Bhanage, *ChemCatChem*, 2018, DOI: 10.1002/cctc.201800185.
- 3) Tian-Xiang Zhao, Gao-Wen Zhai, Jian Liang, Ping Li, Xing-Bang Hu and You-Ting Wu, *Chem. Commun.*, **2017**, *53*, 8046-8049.
